# Supplementary material for: Localized conformal prediction: a generalized inference framework for conformal prediction
Source: Oxford University Press journal article supplement (doi:10.1093/biomet/asac040), 2022-07-21
Supplement: asac040_supplementary_data.pdf [file asac040_supplementary_data.pdf]

## Supplements to Localized Conformal Prediction: A Generalized Inference Framework for Conformal Prediction

BY LEYING GUAN

Dept. of Biostatistics, Yale University,  
 New Haven, CT, USA.

leying.guan@yale.edu

5

In this Supplement, we describe a few supplemental Lemmas used in our proofs to results in the main paper in Appendix A. We then give proofs to results in the main paper in Appendix B and proofs to the supplemental Lemmas in Appendix C. We provide details of the construction of the dissimilarity measure  $d(\cdot, \cdot)$  used in this paper and the automatic choice of  $h$  in Appendix D.

10

Without loss of generality, we always assume that  $V_1 \leq V_2 \leq \dots \leq V_n$  in this Supplement. We use  $\mathbb{E}[\cdot]$  to represent the expectation of a given variable and we refer to conformal prediction as CP and localized conformal prediction as LCP for convenience.

### A. A COLLECTION OF SUPPLEMENTAL LEMMAS

Lemma A.1 describes the elementary relationship used in the proof from previous work on weighted conformal prediction (Barber et al., 2019), and we state it here for the reader's convenience. Lemma A.2 states the monotone dependence of  $Q(\tilde{\alpha}; \hat{\mathcal{F}}_i(v))$  on  $\tilde{\alpha}$  or  $v$ . Lemma A.3 is a core Lemma on the marginal coverage guarantee for LCP with strategically chosen  $\tilde{\alpha}$ . Lemma A.4 collects basic bounds used in the proofs of Theorem 3.

15

Lemma A.1. For any  $\alpha$  and sequence  $\{V_1, \dots, V_{n+1}\}$ , we have

20

$$V_{n+1} \leq Q(\alpha; \sum_{i=1}^n w_i \delta_{V_i} + w_{n+1} \delta_{V_{n+1}}) \Leftrightarrow V_{n+1} \leq Q(\alpha; \sum_{i=1}^n w_i \delta_{V_i} + w_{n+1} \delta_{\infty}),$$

where  $\sum_{i=1}^n w_i \delta_{V_i} + w_{n+1} \delta_{V_{n+1}}$  and  $\sum_{i=1}^n w_i \delta_{V_i} + w_{n+1} \delta_{\infty}$  are some weighted empirical distributions with weights  $w_i \geq 0$  and  $\sum_{i=1}^{n+1} w_i = 1$ .

Lemma A.2. Suppose  $\{V_i, i = 1, \dots, n\}$ , the target level  $\alpha$ , and empirical weights  $p_{ij}^H$  are given. Then,

(i) Given  $V_{n+1}$ ,  $Q(\tilde{\alpha}; \hat{\mathcal{F}}_i(V_{n+1}))$  for  $i = 1, \dots, n+1$  and  $Q(\tilde{\alpha}; \hat{\mathcal{F}})$  are non-decreasing, right-continuous and piece-wise constant on  $\tilde{\alpha}$ , and with value changing only at the cumulative probabilities at different  $V_i$ .

25

(ii) Given  $\tilde{\alpha}$ ,  $Q(\tilde{\alpha}; \hat{\mathcal{F}}_i(v))$  is non-decreasing on  $v$  for  $i = 1, \dots, n+1$ .

(iii) If  $V_{n+1} = v$  is accepted in the  $C_V(X_{n+1})$  in Lemma 1, then  $v'$  is accepted for any  $v' \leq v$ .

Lemma A.3. Let  $V_i = V(Z_i; \mathcal{Z})$  be the score for sample  $i$ , and  $Z_i$  is i.i.d generated for  $i = 1, \dots, n+1$ . For any event

30

$$\mathcal{T} := \{\{Z_i, i = 1, \dots, n+1\} = \{z_i := (x_i, y_i), i = 1, \dots, n+1\}\},$$

we have

$$\mathbb{P}\{V_{n+1} \leq Q(\tilde{\alpha}; \sum_{i=1}^{n+1} p_{n+1,i}^H \delta_{V_i}) | \mathcal{T}\} = \mathbb{E} \left[ \frac{1}{n+1} \sum_{i=1}^{n+1} \mathbb{1}_{v_i \leq v_i^*} | \mathcal{T} \right],$$

where  $v_i = V(z_i; (z_1, \dots, z_n, z_{n+1}))$ ,  $v_i^* = Q(\tilde{\alpha}; \sum_{j=1}^{n+1} p_{i,j}^H \delta_{v_j})$  for  $i = 1, 2, \dots, n+1$ , and  $\tilde{\alpha}$  can be random but is independent of the data conditional on  $\mathcal{T}$ . The expectation on the right side is taken over the randomness of  $\tilde{\alpha}$  conditional on  $\mathcal{T}$ .

35 **Lemma A.4.** Suppose that Assumption 1 holds and  $V(\cdot)$  is a fixed function. For any  $x_0$ , define  $B(x_0) = \sum_{j=1}^{n+1} H(x_0, X_j)$ ,  $\Delta(x_0, X) = H(x_0, X) \max_v |P_{V|X}(v) - P_{V|x_0}(v)|$  and  $\Delta(x_0) = \sum_{i=1}^n \Delta(x_0, X_i)$ . Then,

(i) There exists a constant  $C > 0$  such that, for all  $x_0 \in [0, 1]^p$ , we have

$$\mathbb{P} \left\{ B(x_0) \leq \frac{nh_n^\beta}{2eL} \right\} \leq \exp\left(-\frac{nh_n^\beta}{8L}\right), \quad \frac{\Delta(x_0)}{B(x_0) \vee (nh_n^\beta)} \leq Ch_n \ln(h_n^{-1}).$$

(ii) Set  $B_i = B(X_i)$ ,  $R_i = \frac{\sum_{j \neq i} (\mathbb{1}_{V_j < V_i - P_{V|X_j}(V_i)})}{B_i}$ . Then, for all  $V_i$  and  $i = 1, \dots, n+1$ , we have

$$\mathbb{P} \left\{ |R_i| \geq \sqrt{\frac{\ln n}{B_i}} |X, V_i \right\} \leq \frac{2}{n^2}.$$

## B. PROOFS PROPOSITIONS, LEMMAS AND THEOREMS

40 In this section, we provide proofs omitted from the main paper. We first give arguments to Proposition 1 and Proposition 2 for the counterexamples. We then present proofs to Theorem 1, Theorem 2, Lemma 1, Lemma 2 that characterize the marginal behavior of LCP and our implementation. After that, we prove Theorem 3 - 4 on the asymptotic and local behaviors of LCP-type procedures.

### PROOFS OF THE COUNTER EXAMPLES

#### 45 B.1. Proof of Proposition 1

*Proof.* When  $\sum_{i=1}^{n+1} H(X_{n+1}, X_i) < \frac{1}{1-\alpha}$ , by definition, we have

$$\sum_{i=1}^n p_{n+1,i}^H = \frac{\sum_{i=1}^n H_{n+1,i}}{\sum_{i=1}^{n+1} H_{n+1,i}} < \frac{\frac{1}{1-\alpha} - 1}{\frac{1}{1-\alpha}} = \alpha.$$

We thus have  $Q(\alpha; \hat{\mathcal{F}}) = \infty$ , and consequently,

$$\mathbb{P}(Q(\alpha; \hat{\mathcal{F}}) = \infty) = \mathbb{P}\left(\sum_{i=1}^n p_{n+1,i}^H < \alpha\right) = \mathbb{P}\left(\sum_{i=1}^{n+1} H(X_{n+1}, X_i) < \frac{1}{1-\alpha}\right) \geq \varepsilon.$$

$$\mathbb{P}(Y_{n+1} \in C(X_{n+1})) \geq \mathbb{P}(Q(\alpha; \hat{\mathcal{F}}) = \infty) \geq \varepsilon.$$

#### 50 B.2. Proof of Proposition 2

*Proof.* For  $X_{n+1} \in \{\pm e_j, j = 1, \dots, p\}$ , let  $n_0$  is the number of samples with  $X_i = 0$  and  $n_1$  is the number of samples with  $X_i = X_{n+1}$ . The achieved conditional coverage at  $\tilde{\alpha} = \alpha$  given  $\mathcal{X} = X_{1:(n+1)}$  can be upper bounded as below:

$$\begin{aligned} \mathbb{P} \left\{ V_{n+1} \leq Q(\alpha; \hat{\mathcal{F}}) | \mathcal{X} \right\} &= \mathbb{P} \left\{ V_{n+1} \leq Q\left(\alpha; \frac{1}{n_1 + n_0 + 1} \sum_{i: X_i \in \{0, X_{n+1}\}} \delta_{V_i} + \frac{1}{n_1 + n_0 + 1} \delta_\infty\right) | \mathcal{X} \right\} \\ &\stackrel{(a)}{\leq} \frac{1}{n_1 + 1} + \frac{n_0 + n_1 + 1}{n_1 + 1} \left[ \alpha - \frac{n_0}{n_0 + n_1 + 1} \right]_+, \end{aligned} \quad (\text{B.1})$$

Step (a) holds because:

- When  $\alpha \leq \frac{n_0}{n_1 + n_0 + 1}$ , the  $\alpha$  quantile of the weighted empirical distribution is 0, and we will have 0 coverage for  $X_{n+1} \neq 0$  and (B.1) is true.

- When  $\alpha > \frac{n_0}{n_1+n_0+1}$ , the  $\alpha$  quantile of the weighted empirical distribution in (B.1) is the  $\lceil (n_1+n_0+1)\alpha \rceil - n_0$  largest value in  $\{V_i : X_i = X_{n+1}\} \cup V_\infty$ , which is the  $\frac{\lceil (n_1+n_0+1)\alpha \rceil - n_0}{n_1+1}$  quantile of the unweighted empirical distribution formed by  $\{V_i : X_i = X_{n+1}\} \cup V_\infty$ . By Lemma A.1,  $\{V_{n+1} \leq Q(t; \{V_i : X_i = X_{n+1}\} \cup V_\infty)\} \Leftrightarrow \{V_{n+1} \leq Q(t; \{V_i : X_i = X_{n+1}\} \cup V_{n+1})\}$ . Hence, we have

$$\begin{aligned} \mathbb{P} \left\{ V_{n+1} \leq Q(\alpha; \hat{\mathcal{F}}) | \mathcal{X} \right\} &= \mathbb{P} \left\{ V_{n+1} \leq Q\left(\frac{\lceil (n_1+n_0+1)\alpha \rceil - n_0}{n_1+1}; \{V_i : X_i = X_{n+1}\} \cup V_{n+1}\right) | \mathcal{X} \right\} \\ &\stackrel{(b)}{=} \frac{\lceil (n_1+n_0+1)\alpha \rceil - n_0}{n_1+1} \leq \frac{1}{n_1+1} + \frac{n_0+n_1+1}{n_1+1} \left(\alpha - \frac{n_0}{n_0+n_1+1}\right), \end{aligned} \quad (65)$$

where step (b) uses the fact that  $V_i \sim \text{Unif}[-1, 1]$  for all  $i$  with  $X_i = X_{n+1}$ . Hence, (B.1) holds.  $\square$

Next, we marginalize over  $X_{1:n}$  but conditional on  $m = n_0 + n_1$  (the total number of samples with  $X_i \in \{0, X_{n+1}\}$ ). From (B.1):

$$\begin{aligned} \mathbb{P} \left\{ V_{n+1} \leq Q(\alpha; \hat{\mathcal{F}}) | m, X_{n+1} \right\} &\leq \mathbb{E} \left[ \frac{1}{n_1+1} | m \right] + \mathbb{E} \left[ \left[ \alpha \frac{m+1}{n_1+1} - \frac{n_0}{n_1+1} \right]_+ | m \right], \\ &= \mathbb{E} \left[ \frac{1}{n_1+1} | m \right] + \mathbb{E} \left[ \left[ \alpha \frac{m+1-n_0}{n_1+1} - (1-\alpha) \frac{n_0}{n_1+1} \right]_+ | m \right], \\ &= \mathbb{E} \left[ \frac{1}{n_1+1} | m \right] + (1-\alpha) \mathbb{E} \left[ \left[ \frac{\alpha}{1-\alpha} - \frac{n_0}{n_1+1} \right]_+ | m \right]. \end{aligned} \quad (B.2)$$

Notice that conditional on  $m$ ,  $X_i$  falls at 0 or  $X_{n+1}$  following an independent Bernoulli law:

$$X_i = \begin{cases} 0 & \text{w.p. } \frac{q_0}{q_0+q_1} = \alpha, \\ X_{n+1} & \text{w.p. } \frac{q_1}{q_0+q_1} = 1-\alpha. \end{cases}$$

From direct calculations, we obtain that

$$\begin{aligned} \mathbb{E} \left[ \frac{1}{n_1+1} | m \right] &= \sum_{n_1=0}^m \frac{1}{n_1+1} \frac{m!}{n_1!(m-n_1)!} (1-\alpha)^{n_1} \alpha^{m-n_1} \\ &= \frac{1}{(m+1)(1-\alpha)} \sum_{n_1=1}^{m+1} \frac{(m+1)!}{n_1!(m+1-n_1)!} (1-\alpha)^{n_1} \alpha^{m+1-n_1} \leq \frac{1}{m(1-\alpha)}. \end{aligned} \quad (B.3)$$

Also, we have

$$\begin{aligned} &\mathbb{E} \left[ \left[ \frac{\alpha}{1-\alpha} - \frac{n_0}{n_1+1} \right]_+ | m \right] \\ &\stackrel{(c)}{=} \frac{\alpha}{1-\alpha} \mathbb{P}(n_0 \leq \alpha(m+1) | m) - \sum_{n_0=1}^{n_0 \leq \alpha(m+1)} \frac{n_0}{m-n_0+1} \frac{m!}{n_0!(m-n_0)!} \alpha^{n_0} (1-\alpha)^{m-n_0} \\ &= \frac{\alpha}{1-\alpha} \left( \mathbb{P}(n_0 \leq \alpha(m+1) | m) - \sum_{n_0=0}^{n_0 \leq \alpha(m+1)-1} \frac{m!}{n_0!(m-n_0)!} \alpha^{n_0} (1-\alpha)^{m-n_0} \right) \\ &= \frac{\alpha}{1-\alpha} (\mathbb{P}(n_0 \leq \alpha(m+1) | m) - \mathbb{P}(n_0 \leq \alpha(m+1) - 1 | m)) \\ &= \frac{\alpha}{1-\alpha} \mathbb{P}(n_0 = \underbrace{\lfloor \alpha(m+1) \rfloor}_{n_*} | m) = \frac{\alpha}{1-\alpha} \binom{m}{n_*} \alpha^{n_*} (1-\alpha)^{m-n_*}. \end{aligned} \quad (B.4)$$

We now use the Stirling's approximation:

$$\sqrt{2\pi k} \left(\frac{k}{e}\right)^k e^{\frac{1}{12k+1}} \leq k! \leq \sqrt{2\pi k} \left(\frac{k}{e}\right)^k e^{\frac{1}{12k}}, \quad \text{for all } k \geq 1.$$

4

Plug the Stirling's approximation into (B.4), there exist a constant  $C > 0$  such that when  $m \geq C$ , we have:

$$\begin{aligned} \mathbb{E} \left[ \left[ \frac{\alpha}{1-\alpha} - \frac{n_0}{n_1+1} \right]_+ | m \right] &\leq \frac{\alpha}{1-\alpha} \exp\left(\frac{1}{12m}\right) \sqrt{\frac{m}{2\pi(n^*)(m-n^*)}} \left(\alpha \frac{m}{n^*}\right)^{n^*} \left( (1-\alpha) \frac{m}{m-n^*} \right)^{m-n^*} \\ &\stackrel{(c)}{\leq} \frac{\alpha}{1-\alpha} \exp\left(\frac{1}{12m}\right) \sqrt{\frac{m}{2\pi(m\alpha-1)(m(1-\alpha)-1)}} \left(\frac{m\alpha}{m\alpha-1}\right)^{n^*} \left(\frac{(1-\alpha)m}{m(1-\alpha)-1}\right)^{m-n^*} \\ &\leq C \sqrt{\frac{1}{m}} \left(1 + \frac{2}{m}\right)^m \leq \frac{Ce^2}{\sqrt{m}}, \end{aligned} \quad (\text{B.5})$$

where we have used the fact that  $m\alpha + 1 \leq n^* \leq \alpha m - 1$  at step (c). Notice that  $m$  itself follows a binomial distribution with  $n$  trials and successful rate  $(q_1 + q_0)$ . Apply the Chernoff bound, we have

$$\mathbb{P} \left\{ m \leq \frac{(q_1 + q_0)n}{2} \right\} \leq \exp\left(-\frac{n(q_1 + q_0)}{8}\right). \quad (\text{B.6})$$

For any constant  $p \geq 1$ ,  $n(q_1 + q_0) \rightarrow \infty$ . Combine it with (B.2), (B.3), (B.5) and (B.6), there exist a constant  $C > 0$ , such that for all  $X_{n+1} \in \{\pm e_j, j = 1, \dots, p\}$ , we have

$$\begin{aligned} &\mathbb{P} \left\{ V_{n+1} \leq Q(\alpha; \hat{\mathcal{F}}) | X_{n+1} \right\} \\ &\leq \mathbb{P} \left\{ \left\{ V_{n+1} \leq Q(\alpha; \hat{\mathcal{F}}) | X_{n+1} \right\} \cap \left\{ m \geq \frac{(q_1 + q_0)n}{2} \right\} \right\} + \mathbb{P} \left\{ m \geq \frac{(q_1 + q_0)n}{2} | X_{n+1} \right\} \leq C \sqrt{\frac{1}{(q_1 + q_0)n}}. \end{aligned}$$

Marginalize over  $X_{n+1}$ , we reach the desired result: there exists a sufficiently large constant  $C$ , such that

$$\mathbb{P} \left\{ V_{n+1} \leq Q(\alpha; \hat{\mathcal{F}}) \right\} \leq \mathbb{P} \{ X_{n+1} \neq 0 \} \frac{C}{\sqrt{(q_0 + q_1)n}} + \mathbb{P} \{ X_{n+1} = 0 \} \leq \frac{C}{\sqrt{(q_0 + q_1)n}} + q_0 \rightarrow q_0.$$

### B.3. Proof of Theorem 1

*Proof.* Define

$$\mathcal{T} := \{ \{ Z_i, i = 1, \dots, n+1 \} = \{ z_i := (x_i, y_i), i = 1, \dots, n+1 \} \}.$$

Let  $\sigma$  be a permutation of numbers  $1, 2, \dots, n+1$  that specifies how the values are assigned, e.g.,  $Z_i$  takes value  $z_{\sigma_i}$ . Since  $V(\cdot; \mathcal{Z})$  and  $H(\cdot, \cdot; \mathcal{X})$  are fixed conditional on  $\mathcal{T}$ , we can set  $v_{\sigma_i}^* = Q(\tilde{\alpha}; \sum_{j=1}^n p_{\sigma_i j}^H \delta_{v_j})$

as the realized empirical quantile at  $\tilde{\alpha}$  for  $\hat{\mathcal{F}}_i$  given a particular permutation ordering  $\sigma$ . Hence, for any given  $\tilde{\alpha} \in \Gamma$ , conditional  $\mathcal{T}$  and the permutation ordering  $\sigma$ , we have

$$\sum_{i=1}^{n+1} \mathbb{1}_{V_i \leq Q(\tilde{\alpha}; \hat{\mathcal{F}}_i) | \mathcal{T}, \sigma} = \sum_{i=1}^{n+1} \mathbb{1}_{v_{\sigma_i} \leq v_{\sigma_i}^*} = \sum_{i=1}^{n+1} \mathbb{1}_{v_i \leq v_i^*}. \quad (\text{B.7})$$

In other words, the achieved value for the left side of (B.7) or Theorem 1 (4) remains the same for all  $\sigma$ . Since  $\Gamma$  is fixed conditional on  $\mathcal{T}$ , the smallest value in  $\Gamma$  satisfying (4) is also fixed conditional on  $\mathcal{T}$ , by Lemma A.3, we obtain that

$$\mathbb{P} \{ V_{n+1} \leq Q(\tilde{\alpha}; \hat{\mathcal{F}}_{n+1}) | \mathcal{T} \} = \mathbb{E} \left[ \frac{1}{n+1} \sum_{i=1}^{n+1} \mathbb{1}_{v_i \leq v_i^*} | \mathcal{T} \right] = \frac{1}{n+1} \sum_{i=1}^{n+1} \mathbb{1}_{v_i \leq v_i^*} \geq \alpha$$

Marginalize over  $\mathcal{T}$ , we have

$$\mathbb{P} \{ V_{n+1} \leq Q(\tilde{\alpha}; \hat{\mathcal{F}}_{n+1}) \} \geq \alpha. \quad (\text{B.8})$$

By Lemma A.1, equivalently, we also have

$$\mathbb{P} \{ V_{n+1} \leq Q(\tilde{\alpha}; \hat{\mathcal{F}}) \} \geq \alpha. \quad (\text{B.9})$$

#### B.4. Proof of Theorem 2

Define

$$\mathcal{T} := \{\{Z_i, i = 1, \dots, n+1\} = \{z_i := (x_i, y_i), i = 1, \dots, n+1\}\}.$$

By (B.7) and the fact that  $\Gamma$  is fixed conditional on  $\mathcal{T}$ , we know that  $\tilde{\alpha}_1, \tilde{\alpha}_2$  and  $\alpha_1, \alpha_2$  are fixed conditional on  $\mathcal{T}$ . As a result, when  $\tilde{\alpha} = \begin{cases} \tilde{\alpha}_1 & w.p. \frac{\alpha - \alpha_2}{\alpha_1 - \alpha_2} \\ \tilde{\alpha}_2 & w.p. \frac{\alpha_1 - \alpha}{\alpha_1 - \alpha_2} \end{cases}$ , and it is independent of the data conditional on  $\mathcal{T}$ . Apply Lemma A.3, we have

$$\begin{aligned} \mathbb{P}\{V_{n+1} \leq Q(\tilde{\alpha}; \hat{\mathcal{F}}_{n+1}) | \mathcal{T}\} &= \mathbb{E} \left[ \frac{1}{n+1} \sum_{i=1}^{n+1} \mathbb{1}_{v_i \leq v_i^*} | \mathcal{T} \right] \\ &= \alpha_1 \frac{\alpha - \alpha_2}{\alpha_1 - \alpha_2} + \alpha_2 \frac{\alpha_1 - \alpha}{\alpha_1 - \alpha_2} = \alpha. \end{aligned}$$

Marginalizing over  $\mathcal{T}$ , we have

$$\mathbb{P}\{V_{n+1} \leq Q(\tilde{\alpha}; \hat{\mathcal{F}}_{n+1})\} = \alpha.$$

By Lemma A.1, equivalently, we have

$$\mathbb{P}\{V_{n+1} \leq Q(\tilde{\alpha}; \hat{\mathcal{F}})\} = \alpha.$$

#### B.5. Proof of Lemma 1

*Proof.* As a direct application of Theorem 1 and Corollary 1, we obtain that

$$\mathbb{P}\{V_{n+1} \in C_V(X_{n+1})\} \geq \alpha, \quad \mathbb{P}\{Y_{n+1} \in C(X_{n+1})\} \geq \alpha.$$

The fact that  $C_V(X_{n+1})$  is an interval comes directly from Lemma A.2 (iii).  $\square$

#### B.6. Proof of Lemma 2

*Proof.*

- Proof of part 1: By definition,  $V_{n+1} = v \in C_V(X_{n+1})$  iff (if and only if) the smallest value  $\tilde{\alpha} \in \Gamma$  that makes (6) hold is greater than  $\sum_{V_i < v} p_{n+1,i}^H \in \Gamma$ . That is,  $v \in C_V(X_{n+1})$  iff

$$\frac{1}{n+1} \sum_{i=1}^n \mathbb{1}_{V_i \leq Q(\sum_{V_i < v} p_{n+1,i}^H; \hat{\mathcal{F}}_i(v))} < \alpha. \quad (\text{B.10})$$

- (a) When  $v = \bar{V}_k$  for some  $1 \leq k \leq n+1$ ,  $\sum_{V_i < \bar{V}_k} p_{n+1,i}^H = \tilde{\theta}_k$  by definition. Hence  $v \in C_V(X_{n+1})$  iff

$$\frac{1}{n+1} \sum_{i=1}^n \mathbb{1}_{V_i \leq Q(\tilde{\theta}_k; \hat{\mathcal{F}}_i(\bar{V}_k))} < \alpha. \quad (\text{B.11})$$

- (b) When  $v \in (\bar{V}_{\ell(k)}, \bar{V}_k)$  for some  $1 \leq k \leq n+1$ ,  $\sum_{V_i < v} p_{n+1,i}^H = \sum_{V_i < \bar{V}_k} p_{n+1,i}^H = \tilde{\theta}_k$ . Hence  $v \in C_V(X_{n+1})$  iff

$$\frac{1}{n+1} \sum_{i=1}^n \mathbb{1}_{V_i \leq Q(\tilde{\theta}_k; \hat{\mathcal{F}}_i(v))} < \alpha. \quad (\text{B.12})$$

A key observation is that the status of event  $\{V_i \leq Q(\tilde{\theta}_k; \hat{\mathcal{F}}_i(v))\}$  does not change as we vary  $v \in [\bar{V}_{\ell(k)}, \bar{V}_k)$ . That is, for all  $1 \leq i \leq n$ , we have

$$J_{ik}(v) := \{V_i \leq Q(\tilde{\theta}_k; \hat{\mathcal{F}}_i(v))\} = \{V_i \leq Q(\tilde{\theta}_k; \hat{\mathcal{F}}_i(\bar{V}_{\ell(k)})\} := J_{ik}.$$

This can be easily verified:

110

115

120

125

130

◇ If  $V_i < \bar{V}_k$ , we have  $V_i \leq \bar{V}_{\ell(k)} < v$ , and

$$\{V_i \leq Q(\tilde{\theta}_k; \hat{\mathcal{F}}_i(v))\} = \{\tilde{\theta}_k > \theta_i\} = \{V_i \leq Q(\tilde{\theta}_k; \hat{\mathcal{F}}_i(\bar{V}_{\ell(k)}))\}$$

◇ If  $V_i \geq \bar{V}_k$ , then  $V_i > v > \bar{V}_{\ell(k)}$ , and we have

$$\{V_i \leq Q(\tilde{\theta}_k; \hat{\mathcal{F}}_i(v))\} = \{\tilde{\theta}_k > \theta_i + p_{i,n+1}^H\} = \{V_i \leq Q(\tilde{\theta}_k; \hat{\mathcal{F}}_i(\bar{V}_{\ell(k)}))\},$$

Hence, we obtain

$$\frac{1}{n+1} \sum_{i=1}^n \mathbb{1}_{V_i \leq Q(\tilde{\theta}_k; \hat{\mathcal{F}}_i(\bar{V}_{\ell(k)}))} < \alpha. \quad (\text{B.13})$$

Combine part (a) and part (b), and the fact that  $\bar{V}_{\ell(k)} \leq \bar{V}_k$  and  $Q(\tilde{\theta}_k; \hat{\mathcal{F}}_i(v))$  is non-decreasing in  $v$  (Lemma A.2), we immediately reach the desired result that

$$\bar{C}^V(X_{n+1}) = \{v : v \leq Q(\tilde{\theta}_{k^*}; \hat{\mathcal{F}})\},$$

where  $k^*$  is the largest value of  $k$  such that (B.13) holds.

– Proof of part 2: As we increase  $k$ , both  $\bar{V}_{\ell(k)}$  and  $\tilde{\theta}_k$  are non-decreasing, hence,  $Q(\tilde{\theta}_k; \hat{\mathcal{F}}_i(\bar{V}_{\ell(k)}))$  is non-decreasing in  $k$ . Thus,  $J_{ik} = \{V_i \leq Q(\tilde{\theta}_k; \hat{\mathcal{F}}_i(\bar{V}_{\ell(k)}))\}$  is a monotone event in  $k$ : for all  $k' \geq k$ , we have  $J_{ik} \subseteq J_{ik'}$ . Consequently, suppose  $k_i^*$  is when  $J_{ik}$  first holds, then  $\mathbb{1}_{J_{ik}} = 1$  iff  $k \geq k_i^*$ . We can divide  $J_{ik}$  into two subsets:

$$\begin{aligned} J_{ik} &= \left( \{V_i > \bar{V}_{\ell(k)}\} \cap \{V_i \leq Q(\tilde{\theta}_k; \hat{\mathcal{F}}_i(\bar{V}_{\ell(k)}))\} \right) \cup \left( \{V_i \leq \bar{V}_{\ell(k)}\} \cap \{V_i \leq Q(\tilde{\theta}_k; \hat{\mathcal{F}}_i(\bar{V}_{\ell(k)}))\} \right) \\ &\stackrel{(a)}{=} \underbrace{\left( \{\ell(i) \geq \ell(k)\} \cap \{\theta_i + p_{i,n+1}^H < \tilde{\theta}_k\} \right)}_{J_{ik}^1} \cup \underbrace{\left( \{\ell(i) < \ell(k)\} \cap \{\theta_i < \tilde{\theta}_k\} \right)}_{J_{ik}^2}. \end{aligned} \quad (\text{B.14})$$

At step (a), we have used the fact that

$$V_i > \bar{V}_{\ell(k)} \Leftrightarrow \ell(i) \geq \ell(k),$$

and that

– when  $V_i > \bar{V}_{\ell(k)}$ , we have  $\sum_{1 \leq j \leq n+1: V_j < V_i} p_{ij}^H = \theta_i + p_{i,n+1}^H$  when  $V_{n+1} = \bar{V}_{\ell(k)}$ . Hence,

$$V_i \leq Q(\tilde{\theta}_k; \hat{\mathcal{F}}_i(\bar{V}_{\ell(k)})) \Leftrightarrow \theta_i + p_{i,n+1}^H < \tilde{\theta}_k.$$

– when  $V_i \leq \bar{V}_{\ell(k)}$ , we have  $\sum_{1 \leq j \leq n+1: V_j < V_i} p_{ij}^H = \theta_i$  when  $V_{n+1} = \bar{V}_{\ell(k)}$ . Hence,

$$V_i \leq Q(\tilde{\theta}_k; \hat{\mathcal{F}}_i(\bar{V}_{\ell(k)})) \Leftrightarrow \theta_i < \tilde{\theta}_k.$$

We now consider when  $J_{ik}$  turns true for samples from categories  $A_1$ ,  $A_2$  and  $A_3$ .

– For  $i \in A_1$ , by the definition of  $A_1$  and (B.14), we know that  $J_{ik}$  is true at  $k = i$  and  $k_i^* \leq i$ , and  $J_{ik} = J_{ik}^1 = \{\theta_i + p_{i,n+1}^H < \tilde{\theta}_k\}$ .

– For  $i \in A_2 \cup A_3$ , since  $i \notin A_1$  and  $k_i^* > i$ ,  $J_{ik}^1$  fails to hold for all  $k$ . Hence,  $J_{ik}$  holds when  $J_{ik}^2$  holds.

◇ When  $i \in A_2$ : since  $\theta_i \geq \tilde{\theta}_i$ , in order for  $\theta_i < \tilde{\theta}_k$  to hold, by definition, we must have  $\sum_{j \leq \ell(k)} p_{n+1,j}^H = \tilde{\theta}_k > \tilde{\theta}_i = \sum_{j \leq \ell(i)} p_{n+1,j}^H$ , which automatically guarantees that  $\ell(k) > \ell(i)$ . As a result, for  $i \in A_2$ , we have  $J_{ik} = J_{ik}^2 = \{\theta_i < \tilde{\theta}_k\}$ .

◇ When  $i \in A_3$ : in order to have  $\ell(k) > \ell(i)$ , we automatically have  $\tilde{\theta}_k \geq \tilde{\theta}_i > \theta_i$  for samples in  $A_3$ . Thus, for  $i \in A_3$ , we have  $J_{ik} = J_{ik}^2 = \{\ell(i) < \ell(k)\}$ .

Combine them together, we have

$$\begin{aligned}
S(k) &= \sum_{i=1}^n \frac{1}{n+1} \mathbb{1}_{V_i \leq Q(\bar{\theta}_k; \hat{\mathcal{F}}_i(\bar{V}_{\ell(k)}))} \\
&= \frac{1}{n+1} \left( \sum_{i \in A_1} \mathbb{1}_{J_{ik}^1} + \sum_{i \in A_2} \mathbb{1}_{J_{ik}^2} + \sum_{i \in A_3} \mathbb{1}_{J_{ik}^2} \right) \\
&= \frac{1}{n+1} \left( \sum_{i \in A_1} \mathbb{1}_{\{\theta_i + p_{i,n+1}^H < \bar{\theta}_k\}} + \sum_{i \in A_2} \mathbb{1}_{\theta_i < \bar{\theta}_k} + \sum_{i \in A_3} \mathbb{1}_{l(i) < l(k)} \right).
\end{aligned} \tag{160}$$

We have proved the second part of Lemma 2.  $\square$

## LOCAL COVERAGE PROPERTIES OF LCP

### B.7. Proof of Theorem 3

*Proof.* We first prove the convergence from  $\tilde{\alpha}(v)$  to  $\alpha$  in (11) and then show that the achieved coverage levels converge to the nominal level for both  $\tilde{\alpha} = \alpha$  and  $\tilde{\alpha} = \tilde{\alpha}(v)$  as described in Lemma 1. Define  $I_i = \frac{\sum_{j=1, j \neq i}^n P_{V|X_j}(V_i) H_{ij}}{B_i}$  and  $R_i = \sum_{j=1, j \neq i}^n \frac{H_{ij}(\mathbb{1}_{V_j < V_i} - P_{V|X_j}(V_i))}{B_i}$  for all  $i = 1, \dots, n+1$ . 165

1. **Proof of (11):** For  $i = 1, \dots, n$ , define  $B_i = \sum_{j=1}^{n+1} H_{ij}$  and, for any  $\tilde{\alpha} \in [0, 1]$  and  $v \in \mathbb{R}$ , define

$$J_i(v, \tilde{\alpha}) := \{V_i \leq Q(\tilde{\alpha}; \hat{\mathcal{F}}(v))\} = \left\{ \tilde{\alpha} > \frac{\sum_{j \leq n: V_j < V_i} H_{ij} + \mathbb{1}_{v < V_i}}{B_i} \right\}.$$

$J_i(v, \tilde{\alpha})$  is the event for wether sample  $i$  contributes to the left side of Lemma 1 (6). We can define a subset event  $\underline{J}_i(\tilde{\alpha}) \subseteq J_i(v, \tilde{\alpha})$  for all  $v$  values for all  $v$ . Decompose the condition of  $J_i(v, \tilde{\alpha})$  as below: 170

$$\frac{\sum_{j \leq n: V_j < V_i} H_{ij} + \mathbb{1}_{v < V_i}}{B_i} \leq \frac{\sum_{j \leq n: V_j < V_i} H_{ij}}{B_i} + \frac{1}{B_i} = I_i + R_i + \frac{1}{B_i}. \tag{B.15}$$

Set  $G = \left\{ i \in \{1, \dots, n\} : B_i \geq \frac{1}{2eL} n h_n^\beta, |R_i| \leq \sqrt{\frac{2eL \ln n}{n h_n^\beta}} \right\}$ . By Lemma A.4 (i), there exists a constant  $C > 0$ , such that for all  $i \in G$ :

$$\frac{B_i - 1 - H_{i,n+1}}{B_i} \in \left[ 1 - \frac{4eL}{n h_n^\beta}, 1 \right], \quad |I_i - \frac{B_i - 1 - H_{i,n+1}}{B_i} P_{V|X_i}(V_i)| \leq C h_n \ln(h_n^{-1}). \tag{B.16}$$

Combine (B.15) with (B.16), there exist a constant  $C > 0$  such that for all  $i \in G$ , we have 175

$$\underline{J}_i(\tilde{\alpha}) := \left\{ \tilde{\alpha} > P_{V|X_i}(V_i) + C \left( h_n \ln(h_n^{-1}) + \sqrt{\frac{\ln n}{n h_n^\beta}} \right) \right\} \subseteq J_i(v, \tilde{\alpha}), \text{ for all } v. \tag{B.17}$$

We can also define a superset event  $\bar{J}_i(\tilde{\alpha}) \supseteq J_i(v, \tilde{\alpha})$  for all  $v$  values:

$$\frac{\sum_{j \leq n: V_j < V_i} H_{ij} + \mathbb{1}_{v < V_i}}{B_i} \geq \frac{\sum_{j \leq n: V_j < V_i} H_{ij}}{B_i} = I_i + R_i. \tag{B.18}$$

Combine (B.18) with (B.16), there exists a constant  $C > 0$  such that for all  $i \in G$ , we have

$$J_i(v, \tilde{\alpha}) \subseteq \bar{J}_i(\tilde{\alpha}) := \left\{ \tilde{\alpha} > P_{V|X_i}(V_i) - C \left( h_n \ln(h_n^{-1}) + \sqrt{\frac{\ln n}{n h_n^\beta}} \right) \right\}, \text{ for all } v. \tag{B.19}$$

Hence, we can then upper and lower bound the left side of (6) using  $\bar{J}_i(\tilde{\alpha})$  and  $\underline{J}_i(\tilde{\alpha})$ :

$$\frac{1}{n+1} \sum_{i=1}^{n+1} J_i(v, \tilde{\alpha}) \leq \frac{1}{n+1} + \frac{1}{n+1} \sum_{i \in G} \bar{J}_i(\tilde{\alpha}) + \frac{|G^c|}{n+1}, \quad (\text{B.20})$$

$$\frac{1}{n+1} \sum_{i=1}^{n+1} J_i(v, \tilde{\alpha}) \geq \frac{1}{n+1} \sum_{i \in G} \underline{J}_i(\tilde{\alpha}). \quad (\text{B.21})$$

Set  $W_i = P_{V|X_i}(V_i)$ , which is i.i.d generated from  $\text{Unif}[0, 1]$  when  $V|X_i$  is a continuous variable. By Lemma A.4, we know that

$$\begin{aligned} \mathbb{P}\{|G^c| > 0\} &\leq \mathbb{P}\{\min_{i=1}^n B_i \leq \frac{nh_n^\beta}{2eL}\} + \mathbb{P}\{\exists i \in \{1, \dots, n\} : B_i > \frac{nh_n^\beta}{2eL}, |R_i| > \sqrt{\frac{2eL \ln n}{nh_n^\beta}}\} \\ &\leq \mathbb{P}\{\min_{i=1}^n B_i \leq \frac{nh_n^\beta}{2eL}\} + n \max_{1 \leq i \leq n} \mathbb{P}\{|R_i| > \sqrt{\frac{\ln n}{B_i}}\} \\ &\leq n \exp\left(-\frac{nh_n^\beta}{8L}\right) + n \times \frac{1}{n^2} \rightarrow 0. \end{aligned} \quad (\text{B.22})$$

When  $\{|G^c| = 0\}$  holds:

– When  $\tilde{\alpha}$  makes (6) hold, by (B.20), we must have

$$\frac{1}{n+1} \left(1 + \sum_{i=1}^n \bar{J}_i(\tilde{\alpha})\right) \geq \alpha \Rightarrow \tilde{\alpha} \geq Q\left(\frac{n+1}{n}\alpha - \frac{1}{n}; \frac{1}{n} \sum_{i=1}^n \delta_{W_i}\right) - C \left(h_n \ln(h_n^{-1}) + \sqrt{\frac{\ln n}{nh_n^\beta}}\right). \quad (\text{B.23})$$

– By (B.21),  $\tilde{\alpha}$  makes (6) hold as long as

$$\frac{1}{n+1} \sum_{i=1}^n \underline{J}_i(\tilde{\alpha}) \geq \alpha \Rightarrow \tilde{\alpha} \geq Q\left(\frac{n+1}{n}\alpha; \frac{1}{n} \sum_{i=1}^n \delta_{W_i}\right) + C \left(h_n \ln(h_n^{-1}) + \sqrt{\frac{\ln n}{nh_n^\beta}}\right).$$

Further, since  $\Gamma$  includes all possible empirical CDF values from weighted distribution  $\hat{\mathcal{F}}_i$  for  $i = 1, \dots, n+1$  under all possible ordering of  $V_1, \dots, V_{n+1}$ . Let  $B_{\max} = \max_{i=1}^{n+1} B_i$ . The differences between two adjacent values in  $\Gamma$  is upper bounded by  $\frac{1}{B_{\max}} \leq \frac{2eL}{nh_n^\beta}$ . Hence, there exists a constant  $C > 0$  such that the smallest value in  $\Gamma$  that makes (6) is upper bounded by

$$\tilde{\alpha} \leq Q\left(\frac{n+1}{n}\alpha; \frac{1}{n} \sum_{i=1}^n \delta_{W_i}\right) + C \left(h_n \ln(h_n^{-1}) + \sqrt{\frac{\ln n}{nh_n^\beta}}\right). \quad (\text{B.24})$$

The bounds (B.23) and (B.24) hold for all  $V_{n+1} = v$ . By Dvoretzky–Kiefer–Wolfowitz inequality and the fact that  $W_i \sim \text{Unif}[0, 1]$ , there exists a constant  $C > 0$  such that

$$\mathbb{P}\left(\max_t \left|Q\left(t; \sum_{i=1}^n \delta_{W_i}\right) - t\right| \leq \sqrt{\frac{\ln n}{n}}\right) \leq \frac{C}{n^2}. \quad (\text{B.25})$$

Combine (B.23), (B.24), (B.25) and (B.22), there exist a constant  $C > 0$ , such that

$$\mathbb{P}\left\{\left|\min_{v_{n+1}} \tilde{\alpha}(v_{n+1}) - \alpha\right| < C \left(h_n \ln(h_n^{-1}) + \sqrt{\frac{\ln n}{nh_n^\beta}}\right)\right\} \geq \frac{C}{n^2} + \mathbb{P}(|G^c| > 0) \rightarrow 0. \quad (\text{B.26})$$

Since  $C \left(h_n \ln(h_n^{-1}) + \sqrt{\frac{\ln n}{nh_n^\beta}}\right) \rightarrow 0$ , this concludes our proof.



2. **Proofs of (9) and (10):** By definition, for any given  $\tilde{\alpha}$ ,  $V_{n+1} \leq Q(\tilde{\alpha}; \hat{\mathcal{F}})$  if and only if

$$\sum_{i=1}^n \frac{H(X_{n+1}, X_i)}{B_{n+1}} \mathbb{1}_{V_i < V_{n+1}} = I_{n+1} + R_{n+1} < \tilde{\alpha}. \quad (\text{B.27})$$

Define  $G = \{B_{n+1} \geq \frac{nh_n^\beta}{2eL}, |R_{n+1}| \leq \sqrt{\frac{2eL \ln n}{nh_n^\beta}}\}$ . When  $G$  holds, following the same routine as bounding  $J(\tilde{\alpha}, v)$  with  $\bar{J}(\tilde{\alpha})$  and  $\underline{J}(\tilde{\alpha})$ , we can lower and upper bound  $(I_{n+1} + R_{n+1})$  in (B.27) using Lemma A.4 (i): there exists a constant  $C > 0$ , such that

$$I_{n+1} + R_{n+1} \leq P_{V|X_{n+1}}(V_{n+1}) + C \left( h_n \ln(h_n^{-1}) + \sqrt{\frac{\ln n}{nh_n^\beta}} \right). \quad (\text{B.28})$$

$$I_{n+1} + R_{n+1} \geq P_{V|X_{n+1}}(V_{n+1}) - C \left( h_n \ln(h_n^{-1}) + \sqrt{\frac{\ln n}{nh_n^\beta}} \right). \quad (\text{B.29})$$

$W_{n+1} = P_{V|X_{n+1}}(V_{n+1}) \sim \text{Unif}[0, 1]$  since  $V|X_{n+1}$  is a continuous variable. By Lemma A.4 (i) and (ii),  $\mathbb{P}(G^c) \rightarrow 0$ . Hence, for any given  $\tilde{\alpha}$ , there exists a constant  $C > 0$ , such that

$$\mathbb{P}(I_{n+1} + R_{n+1} < \tilde{\alpha}) \leq \tilde{\alpha} + C \left( h_n \ln(h_n^{-1}) + \frac{1}{(nh_n^\beta)^{1/3}} \right) + \mathbb{P}\{G^c\} \rightarrow \tilde{\alpha}, \quad (\text{B.30})$$

$$\mathbb{P}(I_{n+1} + R_{n+1} < \tilde{\alpha}) \geq \tilde{\alpha} - C \left( h_n \ln(h_n^{-1}) + \frac{1}{(nh_n^\beta)^{1/3}} \right) \rightarrow \tilde{\alpha}. \quad (\text{B.31})$$

Consequently, when  $\tilde{\alpha} = \alpha$  or  $\tilde{\alpha} = \tilde{\alpha}(v) \rightarrow \alpha$  for all  $v$  in probability as described in (11), we achieve an asymptotic conditional coverage at level  $\alpha$ .  $\square$

### B.8. Proof of Theorem 4

*Proof.* We use the result from Barber et al. (2019) which extends CP to the setting with covariate shift:

*Proposition B.1 (Barber et al. (2019), Corollary 1).* For any fixed  $x_0$ . Set  $w_{x_0}(\cdot) = \frac{d\tilde{\mathcal{P}}_X^{x_0}}{d\mathcal{P}_X}$  and  $p_i^{x_0}(x) = \frac{w_{x_0}(X_i)}{\sum_{j=1}^n w_{x_0}(X_j) + w_{x_0}(x)}$  for  $i = 1, \dots, n$ , and  $p_{n+1}^{x_0}(x) = \frac{w_{x_0}(x)}{\sum_{j=1}^n w_{x_0}(X_j) + w_{x_0}(x)}$ . Then,

$$\mathbb{P} \left\{ V(X_{n+1}, Y_{n+1}) \leq Q(\alpha; \sum_{i=1}^{n+1} p_i^{x_0}(X_{n+1}) \delta_{\tilde{V}_i}) \right\} \geq \alpha.$$

In our setting,  $w_{x_0}(x) \propto H(x_0, x)$ . As a direct application of Proposition B.1, when  $(\tilde{X}, \tilde{Y})$  is distributed from  $\tilde{\mathcal{P}}_{XY}^{X_{n+1}}$ , we have

$$\mathbb{P} \left\{ V(\tilde{X}, \tilde{Y}) \leq Q(\alpha; \sum_{i=1}^{n+1} p_i^{x_0}(\tilde{X}) \delta_{\tilde{V}_i}) | X_{n+1} = x_0 \right\} \geq \alpha.$$

Since the  $H(x_0, x_0) \geq H(x_0, \tilde{X})$  by definition, the distribution  $\hat{\mathcal{F}}$  dominates the distribution  $\sum_{i=1}^{n+1} p_i^{x_0}(\tilde{X}) \delta_{\tilde{V}_i}$ : given  $X_{n+1} = x_0$ , for any  $\alpha$ , we have

$$\begin{aligned} Q(\alpha; \hat{\mathcal{F}}) &= Q(\alpha; \sum_{i=1}^{n+1} \frac{H(x_0, X_i)}{\sum_{j=1}^{n+1} H(x_0, X_j)} \delta_{\tilde{V}_i}) \\ &\geq Q(\alpha; \sum_{i=1}^n \frac{H(x_0, X_i)}{\sum_{j=1}^n H(x_0, X_j) + H(x_0, \tilde{X})} \delta_{\tilde{V}_i} + \frac{H(x_0, \tilde{X})}{\sum_{j=1}^n H(x_0, X_j) + H(x_0, \tilde{X})} \delta_{\tilde{V}_i}) = Q(\alpha; \sum_{i=1}^{n+1} p_i^{x_0}(\tilde{X}) \delta_{\tilde{V}_i}). \end{aligned}$$

225 Hence, we have

$$\mathbb{P}\{V(\tilde{X}, \tilde{Y}) \leq Q(\alpha; \hat{\mathcal{F}}) | X_{n+1} = x_0\} \geq \alpha, \text{ for all } x_0.$$

Next, we turn to the achieved coverage using  $\tilde{C}(X_{n+1})$ . By construction, we have

$$\begin{aligned} \{\tilde{Y} \in \tilde{C}(X_{n+1})\} &= \{V(X_{n+1}, \tilde{Y}) \leq Q(\alpha; \hat{\mathcal{F}}) + \varepsilon(X_{n+1})\} \\ &\supseteq \{V(\tilde{X}, \tilde{Y}) \leq Q(\alpha; \hat{\mathcal{F}})\}. \end{aligned}$$

Consequently, we obtain

$$\mathbb{P}\{\tilde{Y} \in \tilde{C}(X_{n+1}) | X_{n+1} = x_0\} \geq \mathbb{P}\{V(\tilde{X}) \leq Q(\alpha; \hat{\mathcal{F}}) | X_{n+1} = x_0\} \geq \alpha.$$

230

### C. PROOF OF LEMMAS IN THE APPENDIX

#### C.1. Proof of Lemma A.1

*Proof.* By definition, we know

$$V_{n+1} \leq Q(\alpha; \sum_{i=1}^n w_i \delta_{V_i} + w_{n+1} \delta_{V_{n+1}}) \Rightarrow V_{n+1} \leq Q(\alpha; \sum_{i=1}^n w_i \delta_{V_i} + w_{n+1} \delta_{\infty}).$$

To show that Lemma A.1 holds, we only need to show that,

$$V_{n+1} > Q(\alpha; \sum_{i=1}^n w_i \delta_{V_i} + w_{n+1} \delta_{V_{n+1}}) \Rightarrow V_{n+1} > Q(\alpha; \sum_{i=1}^n w_i \delta_{V_i} + w_{n+1} \delta_{\infty}).$$

235 Let  $Q(\alpha; \sum_{i=1}^n w_i \delta_{V_i} + w_{n+1} V_{n+1}) = V_{i^*}$  for some index  $1 \leq i^* \leq n+1$ . When  $V_{n+1} > V_{i^*}$ , we must have  $V_{i^*} < \infty$ . By definition:

$$\begin{aligned} \alpha &\geq \sum_{i=1}^{n+1} w_i \mathbb{1}_{V_i \leq V_{i^*}} = \sum_{i=1}^n w_i \mathbb{1}_{V_i \leq V_{i^*}} = \sum_{i=1}^n w_i \mathbb{1}_{V_i \leq V_{i^*}} + w_{n+1} \mathbb{1}_{\infty \leq V_{i^*}} \\ &\Rightarrow Q(\alpha; \sum_{i=1}^n w_i \mathbb{1}_{V_i} + w_{n+1} \delta_{\infty}) \leq V_{i^*} < V_{n+1}. \end{aligned}$$

#### C.2. Proof of Lemma A.2

*Proof.* We can prove Lemma A.2 with elementary calculus arguments.

240 (i) Given  $V_1, \dots, V_{n+1}$ ,  $Q(\tilde{\alpha}; \hat{\mathcal{F}}_i) = \inf\{t : \mathbb{P}(v \leq t) \geq \tilde{\alpha}, v \sim \hat{\mathcal{F}}_i\}$ . The empirical distribution  $\hat{\mathcal{F}}$  is discrete with mass  $p_{ij}^H$  on  $V_i$ , we can have an explicit expression for  $Q(\tilde{\alpha}; \hat{\mathcal{F}}_i)$ :

$$Q(\tilde{\alpha}; \hat{\mathcal{F}}_i) = \begin{cases} \bar{V}_0, & \tilde{\alpha} = 0, \\ \bar{V}_i, & \sum_{j=1}^{i-1} p_{ij}^H < \tilde{\alpha} \leq \sum_{j=1}^i p_{ij}^H, i = 1, \dots, n, \\ \bar{V}_{n+1}, & \sum_{j=1}^n p_{ij}^H < \tilde{\alpha}. \end{cases}$$

Hence,  $Q(\tilde{\alpha}; \hat{\mathcal{F}}_i)$  is non-decreasing and right-continuous piece-wise constant on  $\tilde{\alpha}$ , and  $v_i^*$  can only change its value at  $\sum_{j=1}^k p_{ij}^H$  for  $k = 1, \dots, n$ . The same is true for  $Q(\tilde{\alpha}; \hat{\mathcal{F}})$ .

245 (ii) Given  $\tilde{\alpha}$ , when increasing  $V_{n+1}$  from  $V_{n+1} = v'$  to  $V_{n+1} = v$  for  $v > v'$ , the empirical distribution  $\hat{\mathcal{F}}_i(v)$  dominates the empirical distribution  $\hat{\mathcal{F}}_i(v')$  by construction:  $\forall \tilde{\alpha}$ , we have

$$\mathbb{P}\{t \leq \tilde{\alpha} | t \sim \hat{\mathcal{F}}_i(v')\} \geq \mathbb{P}\{t \leq \tilde{\alpha} | t \sim \hat{\mathcal{F}}_i(v)\}.$$

As a result,  $Q(\tilde{\alpha}; \hat{\mathcal{F}}_i(v))$  is non-decreasing on  $v$  for any given  $\tilde{\alpha}$ , for  $i = 1, \dots, n+1$ .

(iii) Suppose that  $v \in C_V(X_{n+1})$ . Let  $\tilde{\alpha} \in \Gamma$  be the smallest value such that

$$\sum_{i=1}^{n+1} \frac{1}{n+1} \mathbb{1}_{V_i \leq Q(\tilde{\alpha}; \hat{\mathcal{F}}_i(v))} \geq \alpha,$$

by definition, we have  $v \leq Q(\tilde{\alpha}; \hat{\mathcal{F}})$ . Now, we consider  $V_{n+1} = v'$  for  $v' \leq v$ . By the monotonicity of  $Q(\tilde{\alpha}; \hat{\mathcal{F}}_i(v))$  on  $\tilde{\alpha}$  and  $v$  from Lemma A.2 (i) and (ii), we must have  $\tilde{\alpha}' \geq \tilde{\alpha}^*$  where  $\tilde{\alpha}' \in \Gamma$  is the smallest value satisfying

250

$$\sum_{i=1}^{n+1} \frac{1}{n+1} \mathbb{1}_{V_i \leq Q(\tilde{\alpha}'; \hat{\mathcal{F}}_i(v'))} \geq \alpha,$$

Hence, we have  $v' \leq v \leq Q(\tilde{\alpha}; \hat{\mathcal{F}}) \leq Q(\tilde{\alpha}'; \hat{\mathcal{F}})$  and  $v'$  is included in the PI. This concludes our proof.  $\square$

### C.3. Proof of Lemma A.3

*Proof.* Let  $\sigma$  be a permutation of numbers  $1, 2, \dots, n+1$ . We know that

$$\mathbb{P}\{\sigma_{n+1} = i | \mathcal{T}\} = \frac{\#\{\sigma : \sigma_{n+1} = i\}}{\sum_{j=1}^{n+1} \#\{\sigma : \sigma_{n+1} = j\}} = \frac{1}{n+1}.$$

255

Set  $\mathcal{X} = \{X_1, \dots, X_{n+1}\}$  be the unordered set of the features. Since the function  $V(\cdot, \mathcal{Z})$  and the localizer  $H(\cdot, \cdot, \mathcal{X})$  are fixed functions conditional on  $\mathcal{T}$ , and  $\tilde{\alpha}$  (can be random) is independent of the data conditional  $\mathcal{T}$ , we obtain

$$\begin{aligned} & \mathbb{P}\left\{V_{n+1} \leq Q(\tilde{\alpha}; \sum_{j=1}^{n+1} p_{n+1,j}^H \delta_{V_j}) | \mathcal{T}, \tilde{\alpha}\right\} \\ &= \sum_{i=1}^{n+1} \mathbb{P}\{\sigma_{n+1} = i | \mathcal{T}\} \mathbb{1}_{\{V_{n+1} \leq v_{n+1}^*(\sigma) | \mathcal{T}, \sigma_{n+1}=i\}} \\ &= \sum_{i=1}^{n+1} \frac{1}{n+1} \mathbb{1}_{\{v_i \leq v_{n+1}^*(\sigma), \sigma_{n+1}=i\}} \end{aligned} \quad (\text{C.1})$$

260

where

$$v_i^*(\sigma) := Q(\tilde{\alpha}; \sum_{j=1}^{n+1} p_{\sigma_i, \sigma_j}^H \delta_{v_{\sigma_j}}) = Q(\tilde{\alpha}; \sum_{j=1}^{n+1} \frac{H(x_{\sigma_i}, x_{\sigma_j})}{\sum_{j'=1}^{n+1} H(x_{\sigma_i}, x_{\sigma_{j'}})} \delta_{v_{\sigma_j}})$$

is the realization of  $v_i^* := Q(\tilde{\alpha}; \hat{\mathcal{F}}_i)$  under permutation  $\sigma$ , conditional on  $\mathcal{T}$  and  $\tilde{\alpha}$ . We immediately observe that,

$$v_i^*(\sigma) = v_{\sigma_i}^* \quad (\text{C.2})$$

Combine (C.1) and (C.2), we obtain that  $\mathbb{P}\{V_{n+1} \leq v_{n+1}^* | \mathcal{T}, \tilde{\alpha}\} = \sum_{i=1}^{n+1} \frac{1}{n+1} \mathbb{1}_{\{v_i \leq Q(\tilde{\alpha}; \hat{\mathcal{F}}_i)\}}$ . Marginalize over  $\tilde{\alpha} | \mathcal{T}$ , we have

265

$$\mathbb{P}\left\{V_{n+1} \leq Q(\tilde{\alpha}; \hat{\mathcal{F}}_{n+1}) | \mathcal{T}\right\} = \mathbb{E}\left[\sum_{i=1}^{n+1} \frac{1}{n+1} \mathbb{1}_{\{v_i \leq Q(\tilde{\alpha}; \hat{\mathcal{F}}_i)\}} | \mathcal{T}\right].$$

## C.4. Proof of Lemma A.4

*Proof.*

**Part (i):** We divide the space into non-overlapping subregions  $A_k = \{x : (k-1)h_n \leq d(x_0, x) < kh_n\}$ . Then,

$$B(x_0) = \sum_{i=1}^{n+1} \exp\left(-\frac{d(x_0, X_i)}{h_n}\right) \geq \exp(-1) \sum_{i=1}^n \mathbb{1}_{X_i \in A_1},$$

and  $\mathbb{1}_{X_i \in A_1}$  follows a Bernoulli distribution with success probability  $q_i \geq \frac{1}{L}nh_n^\beta$  according to Assumption 1 (ii). We can apply Chernoff Bounds to lower bound  $B(x_0)$ :

$$\mathbb{P}\left\{\sum_{i=1}^n \mathbb{1}_{X_i \in A_1} \leq \frac{nh_n^\beta}{2L}\right\} \leq \exp\left(-\frac{nh_n^\beta}{8L}\right) \Rightarrow \mathbb{P}\left\{B(x_0) \leq \frac{nh_n^\beta}{2eL}\right\} \leq \exp\left(-\frac{nh_n^\beta}{8L}\right).$$

Using the partitions  $\{A_j\}$  and Assumption 1 (i):

$$\begin{aligned} \Delta(x_0) &\leq L \sum_{i=1}^n d(x_0, X_i) \exp\left(-\frac{d(x_0, X_i)}{h_n}\right), \\ &\leq Lh_n \exp(1) \sum_{k=1}^{\infty} k \sum_{i: X_i \in A_k} \exp(-k) \\ &\leq \min_{k_0} \left\{ L \exp(1) k_0 h_n \sum_{k \leq k_0} \sum_{i: X_i \in A_k} H(x_0, X_i) + Lh_n \exp(1) \sum_{k > k_0} \sum_{i: X_i \in A_k} k \exp(-k) \right\} \\ &\leq \min_{k_0} \{eLk_0 h_n B(x_0) + eLh_n k_0 \exp(-k_0)n\} \\ &\leq eL\beta \lceil \ln h_n^{-1} \rceil h_n (B(x_0) + nh_n^\beta), \end{aligned} \tag{C.3}$$

where we have taken  $k_0 = \beta \lceil \ln h_n^{-1} \rceil$  at the last step. Hence, there exists a constant  $C > 0$  such that

$$\frac{\Delta(x_0)}{B(x_0) \vee (nh_n^\beta)} \leq 2eL\beta \lceil \ln h_n^{-1} \rceil h_n \leq C \ln(h_n^{-1})h_n, \text{ for all } x_0 \in [0, 1]^p.$$

**Part (ii):** Set  $Z_{ij} = \frac{H_{ij}}{B_i} (\mathbb{1}_{V_j < V_i} - P_{V|X_j}(V_i))$ , and  $R_i = \sum_{j \neq i} Z_{ij}$ . By Hoeffding's lemma, the centered variable  $Z_{ij}$  is sub-Gaussian with parameter  $\nu_{ij} = \frac{H_{ij}}{2B_i}$  for all  $i, j$  and  $V_i$ : for all  $j \neq i$ ,

$$\mathbb{E}[\exp(\lambda Z_{ij}) | V_i] \leq \exp\left(\frac{\nu_{ij}^2 \lambda^2}{2}\right), \text{ for all } \lambda \in \mathbb{R}.$$

Hence, the weighted sum  $R_i$  is sub-Gaussian with parameter  $\nu_i = \sqrt{\sum_{j \neq i, j \leq n} \frac{H_{ij}^2}{4B_i^2}} \leq \sqrt{\frac{1}{4B_i}}$ , where we have used the fact that  $H_{ij} \leq 1$  and  $B_i = \sum_{j=1}^{n+1} H_{ij}$ . Combining it with the sub-Gaussian concentration results, we obtain that

$$\mathbb{P}\{|R_i| \geq t | \mathcal{X}, V_i\} \leq 2 \exp\left(-\frac{t^2}{2\nu_i^2}\right) \leq 2 \exp(-2t^2 B_i), \text{ for all } V_i, i = 1, \dots, n+1.$$

Take  $t = \sqrt{\frac{\ln n}{B_i}}$ , we obtain the desired bound.  $\square$

## D. CHOICE OF H

### D.1. Estimation of the default distance

Let  $\mathcal{V}$  be the CV fold partitioning when learning  $V$ . We will estimate the spread by learning  $|V_i|$  for  $V_i$  from the cross-validation step and  $i = 1, \dots, n_0$ :

$$V_i \leftarrow \hat{V}^{-i}(X_i^0, Y_i^0),$$

where  $\hat{V}^{-i}$  is the score function learned using samples excluding  $i$ . 290

The spread learning step is using the same CV partitioning  $\mathcal{V}$ . To learn the spread  $\rho(X)$ , we consider minimizing the MSE with the response  $\log(|V_i| + \overline{|V_i|})$ , with  $\overline{|V_i|}$  be the mean absolute value for  $V_i$  across samples in  $\mathcal{D}_0 = \{Z_i^0 = (X_i^0, Y_i^0), i = 1, \dots, n_0\}$ . This additional term  $\overline{|V_i|}$  is added to reduce the influence of samples with very small empirical  $|V_i|$ . 295

We do not claim that learning  $\rho(X)$  in such a way is always a good choice. It is a reasonable choice for the regression score. However, for quantile regression score,  $|V_i|$  can be large around regions with severe under-coverage or over-coverage, making it a poor target. Despite this, the resulting LCP is similar to CP with a poorly chosen  $\hat{\rho}(x)$  for the quantile regression score in our empirical studies. 295

Our estimated  $\hat{\rho}$  is defined as  $\hat{\rho} = \exp(\hat{f}(x))$  where  $\hat{f}(x)$  is the estimated function from the learning step. We let  $\rho_i = \hat{\rho}^{-i}(X_i^0)$  be the estimated spread from the cross-validation step. Let  $J \in \mathbb{R}^{n_0 \times p}$  be the Jacobian matrix with  $J_i = \frac{\partial \hat{f}^{-i}(X_i^0)}{\partial X_i^0}$ . Let  $u_{\parallel} \in \mathbb{R}^{p \times p_0}$  and  $u_{\perp} \in \mathbb{R}^{p \times (p-p_0)}$  be the top  $p_0$  and the remaining right singular vectors, with  $p_0$  be a small constant. By default,  $p_0 = 1$ . We form the projection matrix  $P_{\parallel}$  and  $P_{\perp}$  with  $u_{\parallel}$  and  $u_{\perp}$ :

$$P_{\parallel} = u_{\parallel} u_{\parallel}^{\top}, \quad P_{\perp} = u_{\perp} u_{\perp}^{\top}.$$

The final dissimilarity measure  $d(x_1, x_2)$  is a weighted sum of the three components, and

$$d(x_1, x_2) = \frac{d_1(x_1, x_2)}{\sigma_2} + \frac{(\omega d_2(x_1, x_2) + (1 - \omega) d_3(x_1, x_2))}{\sigma_1},$$

where  $d_2(x_1, x_2)$ ,  $d_3(x_1, x_2)$  are projected distances onto  $P_{\parallel}$  and  $P_{\perp}$ , and  $d_1(x_1, x_2)$  are distance in the space of the learned spreading function  $\hat{\rho}(x_1), \hat{\rho}(x_2)$  as described in Section 3.3: 305

- $d_1(x_1, x_2) = \|\hat{\rho}(x_1) - \hat{\rho}(x_2)\|_2$ .
- $d_2(x_1, x_2) = \|P_{\parallel}(x_1 - x_2)\|_2$ .
- $d_3(x_1, x_2) = \|P_{\perp}(x_1 - x_2)\|_2$ .

We set  $\omega$  and  $\sigma_1, \sigma_2$  as following: 310

- Let  $\mu_{\parallel}/\mu_{\perp}$  be the mean of  $d_2(X_i^0, X_j^0)$  or  $d_3(X_i^0, X_j^0)$  for  $i \neq j$ , then we let  $w = \frac{\mu_{\perp}}{\mu_{\perp} + \mu_{\parallel}}$ .
- We let  $\sigma_1$  be the mean of  $(\omega d_2(X_i^0, X_j^0) + (1 - \omega) d_3(X_i^0, X_j^0))$  and  $\sigma_2$  be that mean of  $d_1(X_i^0, X_j^0)$ , using all pairs  $i \neq j$  from  $\mathcal{D}_0$ .

### D.2. Empirical estimate of the objective

We want to minimize a penalized average length of finite PIs: 315

$$J(h) = \text{Average PI}^{finite} \text{ length} + \lambda \times \text{Average conditional PI}^{finite} \text{ length variability}$$

*s.t.*  $\mathbb{P}(\text{Infinite PI}) \leq \delta$ .

Let  $\mathbb{E}_X f(X)$  denote the expectation of some function  $f(\cdot)$  with over  $X$ . In this tuning section, we consider two specific types of  $V(\cdot)$ : the scaled regression score and the scaled quantile score, and

$$V(X, Y) = \frac{1}{\sigma(X)} |Y - f(X)|,$$

or

$$V(X, Y) = \frac{1}{\sigma(X)} \max\{q_{l_0}(X) - Y, Y - q_{hi}(X)\}.$$

These two score classes will include the four scores considered in our numerical experiments. Let  $k^*$  be the selected index from Lemma 2, for this two classes of scores, the PI of  $Y_{n+1}$  is constructed as

$$C(X_{n+1}) = [f(X_{n+1}) - \sigma(X_{n+1})\bar{V}_{k^*}, f(X_{n+1}) + \sigma(X_{n+1})\bar{V}_{k^*}],$$

or

$$C(X_{n+1}) = [q_{lo}(X_{n+1}) - \sigma(X_{n+1})\bar{V}_{k^*}, q_{hi}(X_{n+1}) + \sigma(X_{n+1})\bar{V}_{k^*}].$$

In both cases, the length over the constructed PI of  $Y_{n+1}$  is additive on  $\sigma(X_{n+1})\bar{V}_{k^*}$ , and hence, minimizing PI of  $Y_{n+1}$  is equivalent to minimizing  $\sigma(X_{n+1})\bar{V}_{k^*}$ , and the conditional variability of the PI is the same as the variability of  $\sigma(X_{n+1})\bar{V}_{k^*}$  conditional on  $X_{n+1}$ . Hence, after omitting components that do not depend on  $h$ , we can express the terms in the above objective as

- Average PI<sup>finite</sup> length:  $\mathbb{E}_{Z_{1:n}, X_{n+1}} [\sigma(X_{n+1})\bar{V}_{k^*} | k^* \leq n]$ . It depends on  $Z_{1:n}, X_{n+1}$  as well as the tuning parameter  $h$ . (Recall that when  $k^* = n + 1$ ,  $\bar{V}_{n+1} = \infty$ .)
- Average conditional PI<sup>finite</sup> length variability:  $\sqrt{\mathbb{E}_{Z_{1:n}, X_{n+1}} [\sigma(X_{n+1})^2 (\bar{V}_{k^*} - \mu(X_{n+1}))^2 | k^* \leq n]}$ , where  $\mu(X_{n+1}) = \mathbb{E}_{Z_{1:n}} [\bar{V}_{k^*} | k^* \leq n, X_{n+1}]$  is the average length finite PI at  $X_{n+1}$ , marginalized over  $Z_{1:n}$ .
- Average percent of infinite PI:  $\mathbb{P}(k^* = n + 1)$ .

We estimate the above quantities with empirical estimates using  $\mathcal{D}_0$ . As in the previous section, we consider the case where the function form  $V(X, Y)$  is estimated by CV and  $V_i \leftarrow \hat{V}^{-i}(X_i^0, Y_i^0)$ . For example, we want to construct the score function  $V(X, Y) = |Y - f(X)|$  where  $f(X)$  is the mean prediction function. Then,  $\hat{V}^{-i}(X_i^0, Y_i^0)$  is calculated as

$$\hat{V}^{-i}(X_i^0, Y_i^0) = |Y_i^0 - \hat{f}^{-k}(x)|,$$

where  $\hat{f}^{-k}(\cdot)$  is the learned mean function using data excluding fold  $k$  that includes sample  $i$ . We also estimate the spreads and define the distance on  $\mathcal{D}_0$  using the CV estimates.

Given the dissimilarity measure  $d_{ij}$  for any pair  $(X_i^0, X_j^0)$ , and thus  $H_{ij} = \exp(-\frac{d_{ij}}{h})$  for a given  $h$ , we estimate the empirical loss for  $h \in \{h_1, \dots, h_m\}$  as below:

- Estimation of average length and infinite PI probability:
  - We subsample  $\tilde{n} = (n + 1) \wedge n_0$  samples without replacement from  $\mathcal{D}_0$ , let the set be  $\mathcal{S}$  and construct PI for each sample  $i \in \mathcal{S}$  with a calibration set  $\mathcal{S} \setminus \{i\}$ . Let  $L_i$  be the scaled length for the constructed PI (scaled by  $\sigma(X_i^0)$ ).
  - The probability of having infinite PI is estimated as  $C_1(h) = \frac{\#\{i \in \mathcal{S}, L_i = \infty\}}{\tilde{n}}$ , and the average finite PI length is estimated as  $C_2(h) = \frac{\sum_{i \in \mathcal{S}, L_i < \infty} L_i}{\#\{b: L_{ib} < \infty\} \sqrt{1}}$ .

The above estimates can be repeated for multiple times when  $n_0$  is much larger than  $(n + 1)$ .

- Estimation of conditional variability:
  - Repeat  $B$  times the PI construction: for  $b = 1, \dots, B$ , we subsample  $n$  samples with replacement from  $\mathcal{D}_0$ , and let the length of scaled PI of  $V$  at  $Z_i^0$  be  $L_{ib}$  for  $i = 1, \dots, n_0$ .
  - Calculate the finite conditional mean as  $\mu_i = \frac{\sum_{b: L_{ib} < \infty} L_{ib}}{\#\{b: L_{ib} < \infty\} \sqrt{1}}$ .
  - Calculate the conditional variance as  $s_i = \frac{\sum_{b: L_{ib} < \infty} (L_{ib} - \mu_i)^2}{\#\{b: L_{ib} < \infty\} \sqrt{1}}$ .
  - The average conditional variability for PI with finite length is estimated as  $C_{3,h} = \sqrt{\frac{\sum_i (\#\{b: L_{ib} < \infty\} \times s_i)}{\#\{(i,b): L_{ib} < \infty\}}}$ .

We take  $h$  from the candidate set to minimize the empirical objective:

$$h = \arg \min_{C_1(h) \leq \delta} (C_2(h) + \lambda C_{3,h}(h)).$$

## REFERENCES

BARBER, R. F., CANDÈS, E. J., RAMDAS, A. & TIBSHIRANI, R. J. (2019). Conformal prediction under covariate shift. *arXiv:1904.06019* .
